# Supplementary material
Source: Springer Nature journal article supplement (https://www.springermedizin.de/resource/supplementary/13058_2011_2934_MOESM9_ESM.pdf/9702912)

**A** % IFN $\gamma$ <sup>+</sup> CD4<sup>+</sup> T cells (6 h)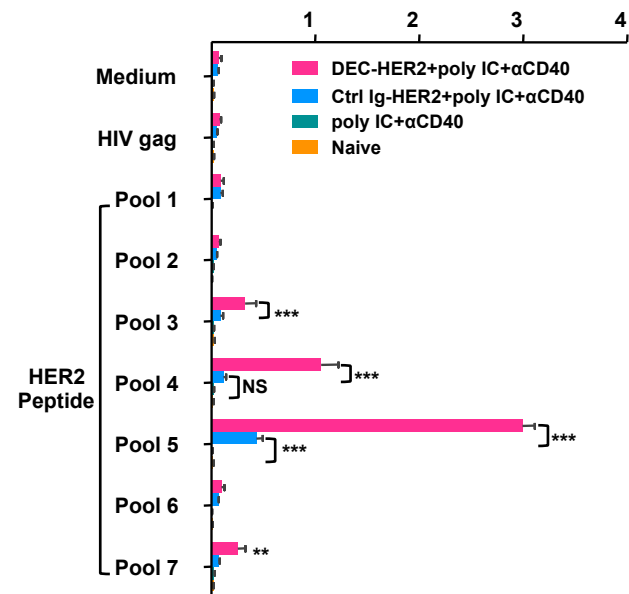**B** % IFN $\gamma$ <sup>+</sup> proliferating CD4<sup>+</sup> T cells (4 d)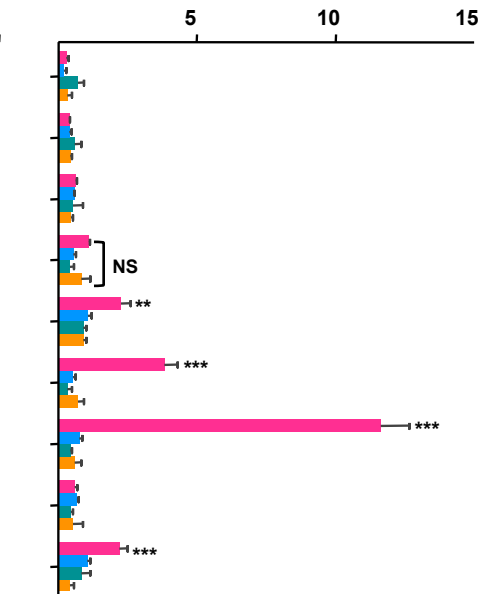**C**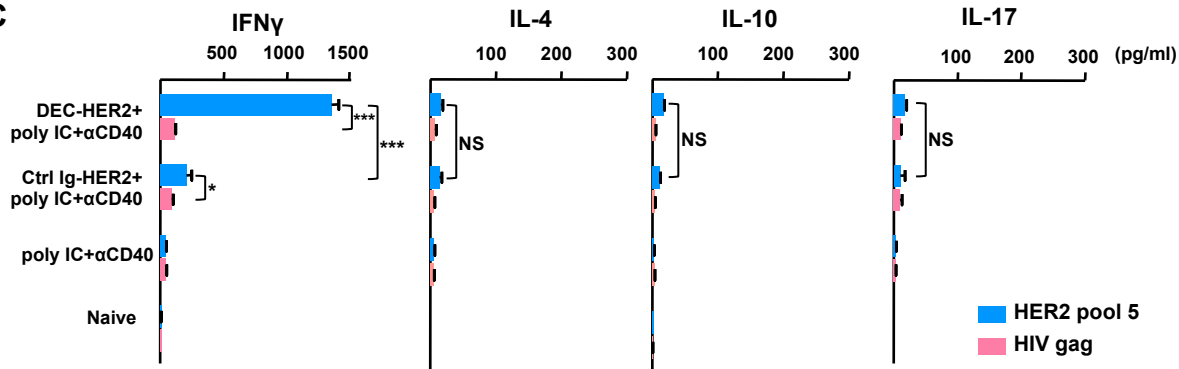

Supplement: MOESM9 [file 9702912]
